# Supplementary material
Source: PubMed Central journal article supplement (PMC6909756)
Supplement: Supp_Fig1.pdf [file Supp_Fig1.pdf]

## Supplementary Data

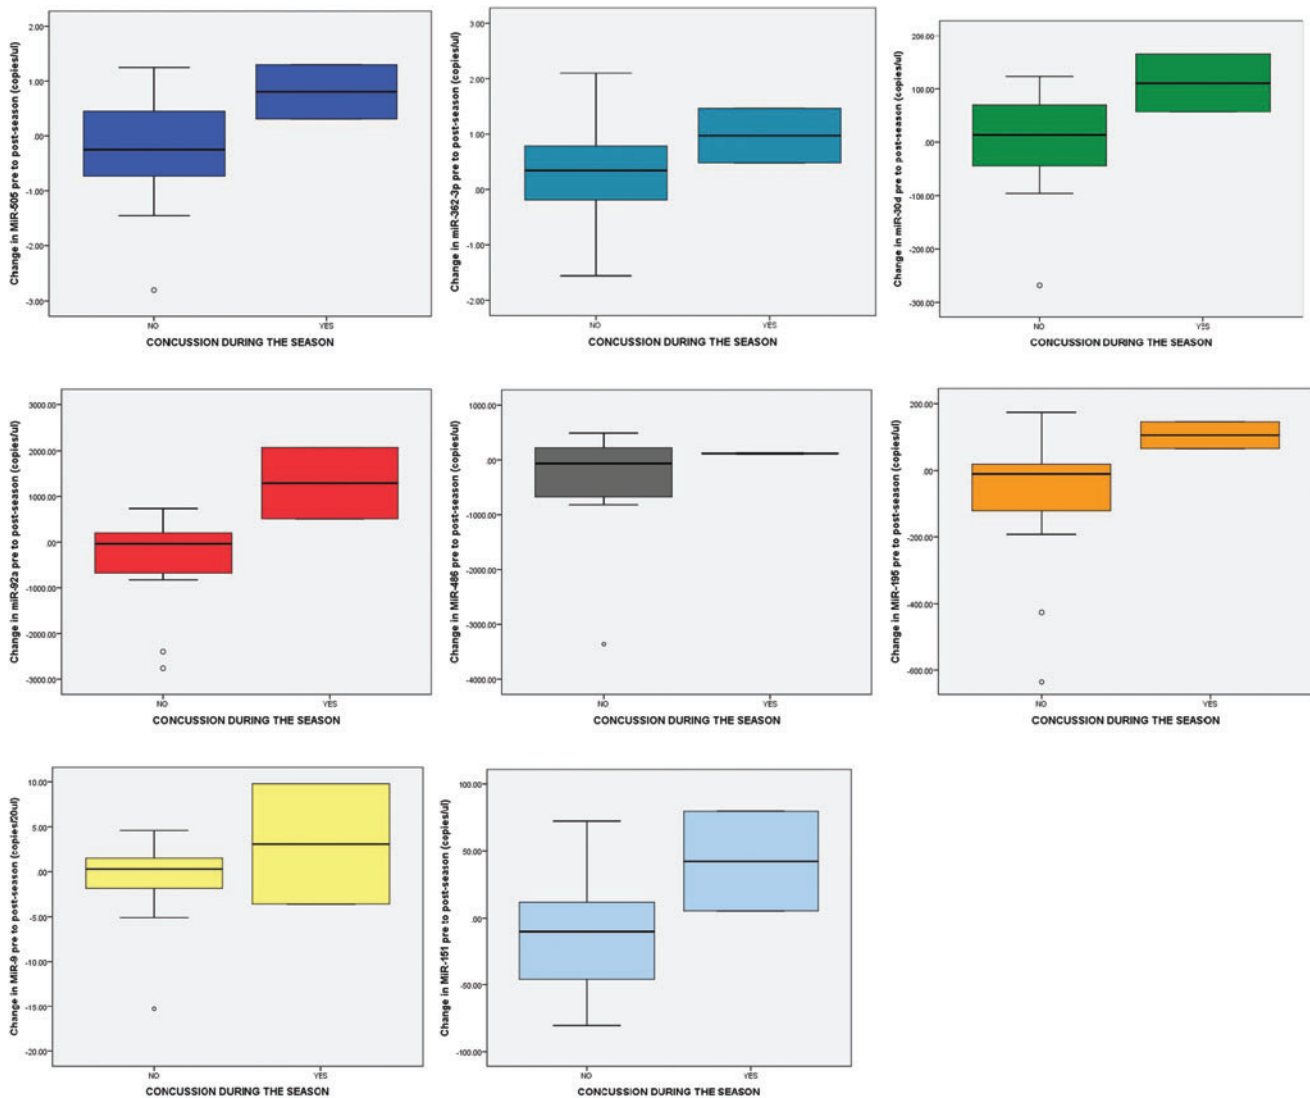

**SUPPLEMENTARY FIG. S1.** Box plots showing changes in microRNAs (miRNAs) pre- to post-season in those with and without concussion during the season. There were only two players (10%) diagnosed with a concussion during the playing season, and concentrations of the miRNA all increased from pre- to post-season in these concussed players. Box plots represent medians with interquartile ranges.
