# Supplementary material
Source: PubMed Central journal article supplement (PMC6909756)
Supplement: Supp_Fig2.pdf [file Supp_Fig2.pdf]

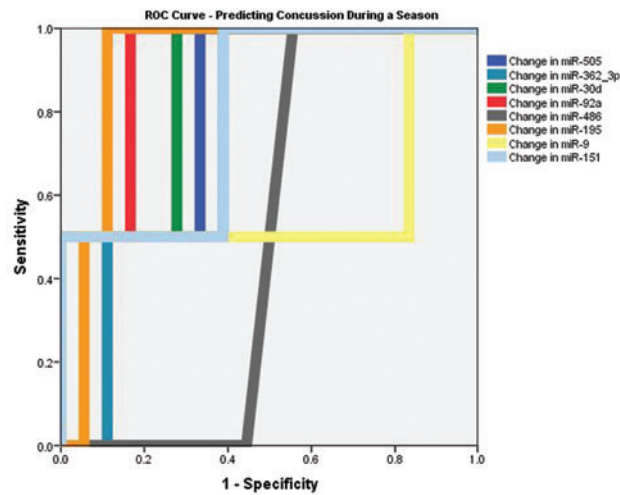

| MicroRNA (n=20) | AUC (95% CI)     |
|-----------------|------------------|
| miR-505*        | 0.83 (0.57-1.00) |
| miR-362-3p      | 0.75 (0.49-1.00) |
| miR-30d         | 0.86 (0.63-1.00) |
| miR-92a         | 0.92 (0.76-1.00) |
| miR-486         | 0.61 (0.39-0.84) |
| miR-195         | 0.92 (0.79-1.00) |
| miR-9-3p        | 0.58 (0-1.00)    |
| miR-151-5p      | 0.81 (0.50-1.00) |

**SUPPLEMENTARY FIG. S2.** Area under the receiver operating characteristics (ROC) curve for change in microRNA levels (pre- to post-season) and concussion during the season. The highest areas under the curve (AUCs) of the miRNAs for comparing concussed versus non-concussed athletes over the season in descending order were miR-195=0.92 (0.79–1.00), miR-92a=0.92 (0.76–0.96), miR-30d=0.86 (0.63–0.88), miR-505\*=0.83 (0.57–1.00), miR-151-5p=0.81 (0.50–1.00), and miR-362-3p=0.75 (0.49–1.00).
